# Supplementary material for: Economic evaluation of a lifestyle intervention in primary care to prevent type 2 diabetes mellitus and cardiovascular diseases: a randomized controlled trial
Source: PubMed Central journal article supplement (PMC3662579; doi:10.1186/1471-2296-14-45), 2013-04-04
Supplement: 1471-2296-14-45-S2.pdf [file 1471-2296-14-45-S2.pdf]

**Additional file 2 - Price weights used for valuation of resource use, per visit unless otherwise mentioned**

| Type of utilization                                   | Price weight <sup>a</sup>   | Source of price weight                          |
|-------------------------------------------------------|-----------------------------|-------------------------------------------------|
| <b>Direct healthcare costs</b>                        |                             |                                                 |
| <i><b>Intervention: practice nurse</b></i>            |                             |                                                 |
| Face to face session, 30 min<br>Phone session, 15 min | 23.82<br>11.91              | General practice collaborative labor agreement. |
| <i><b>Primary care</b></i>                            |                             |                                                 |
| General practitioner                                  | 21.89 <sup>b</sup>          | Dutch costing manual[1]                         |
| Therapists                                            | 24.65 – 54.33 <sup>c</sup>  | Dutch costing manual[1]                         |
| Dietitian                                             | 14.50                       | Dutch costing manual[1]                         |
| Dentist                                               | 18.70                       | Dutch costing manual[1]                         |
| Primary mental health care                            | 51.86 – 134.37 <sup>c</sup> | Dutch costing manual[1]                         |
| <i><b>Secondary care</b></i>                          |                             |                                                 |
| Outpatient visits                                     | 60.68                       | Dutch costing manual[1]                         |
| Admission general hospital (d)                        | 365.18                      | Dutch costing manual[1]                         |
| <b>Direct patient costs</b>                           |                             |                                                 |
| Complementary therapists                              | 25.18 – 82.30 <sup>c</sup>  | Price according to professional organization    |
| OTC                                                   | as reported by patient      | -                                               |
| Sports & sports equipment                             | as reported by patient      |                                                 |
| <b>Indirect productivity losses</b>                   |                             |                                                 |
| Sickness absence (d)                                  | 92 – 218 <sup>d</sup>       | Dutch costing manual[1]                         |

<sup>a</sup> Euros, corrected to the year 2008, <sup>b</sup> Price for consultation at the practice; <sup>c</sup> Range of the price weights for the different providers, <sup>d</sup> Range of costs per sick leave (calendar) day, depending on age and sex

1. Oostenbrink JB, Bouwmans CAM, Koopmanschap MA, Rutten FFH: *[Dutch Manual for Costing: Methods and Standard Costs for Economic Evaluations in Health Care]*. Diemen, The Netherlands: Dutch Health Care Insurance Board; 2004.
