# Supplementary material for: Economic evaluation of a lifestyle intervention in primary care to prevent type 2 diabetes mellitus and cardiovascular diseases: a randomized controlled trial
Source: PubMed Central journal article supplement (PMC3662579; doi:10.1186/1471-2296-14-45), 2013-04-04
Supplement: 1471-2296-14-45-S3.pdf [file 1471-2296-14-45-S3.pdf]

**Additional file 3 - Incremental cost-effectiveness ratios and distribution of the joint cost-effect pairs in the cost-effectiveness plane of all analyses**

**9-year risk for developing T2DM**

| Analysis <sup>a</sup>   | Sample size per group |                   | $\Delta C$<br>(95% CI)<br><br>Euros | $\Delta E$<br>(95% CI)<br><br>T2DM risk | ICER  | Distribution in CE plane (%) |                 |                 |                 |
|-------------------------|-----------------------|-------------------|-------------------------------------|-----------------------------------------|-------|------------------------------|-----------------|-----------------|-----------------|
|                         | Control               | Inter-<br>vention |                                     |                                         |       | NE <sup>b</sup>              | SE <sup>c</sup> | SW <sup>d</sup> | NW <sup>e</sup> |
| Base case               | 300                   | 305               | -866<br>(-2372;370)                 | 0.6<br>(-0.1;1.3)                       | -1416 | 0.6                          | 4.1             | 85.9            | 9.4             |
| Human capital           | 300                   | 305               | -1048<br>(12868;448)                | 0.6<br>(-0.1;1.3)                       | -1714 | 0.6                          | 4.2             | 85.6            | 9.7             |
| Exclusion sports costs  | 300                   | 305               | -758<br>(-2258;442)                 | 0.6<br>(-0.1;1.3)                       | -1239 | 0.7                          | 3.9             | 82.8            | 12.6            |
| Booster calls imputed   | 300                   | 305               | -846<br>(-2377;388)                 | 0.6<br>(-0.1;1.3)                       | -1383 | 0.6                          | 3.9             | 85.0            | 10.6            |
| 50 MI-sets              | 300                   | 305               | -873<br>(-2380; 397)                | 0.7<br>(-0.1;1.4)                       | -1301 | 0.5                          | 3.5             | 86.1            | 9.9             |
| Complete cases          | 117                   | 105               | -30<br>(-2171;1446)                 | 0.7<br>(-0.4;1.7)                       | -44   | 5.1                          | 4.4             | 45.0            | 45.5            |
| Health care perspective | 300                   | 305               | -5<br>(-316;272)                    | 0.6<br>(-0.1;1.3)                       | -8    | 2.2                          | 2.4             | 47.5            | 47.9            |

**10-year risk for CVD mortality**

| Analysis <sup>a</sup>  | Sample size per group |                   | $\Delta C$<br>(95% CI)<br><br>Euros | $\Delta E$<br>(95% CI)<br><br>CVD risk | ICER | Distribution in CE plane (%) |                 |                 |                 |
|------------------------|-----------------------|-------------------|-------------------------------------|----------------------------------------|------|------------------------------|-----------------|-----------------|-----------------|
|                        | Control               | Inter-<br>vention |                                     |                                        |      | NE <sup>b</sup>              | SE <sup>c</sup> | SW <sup>d</sup> | NW <sup>e</sup> |
| Base case              | 300                   | 305               | -866<br>(-2372;370)                 | -0.1<br>(-0.4;0.2)                     | 6405 | 8.0                          | 74.3            | 15.4            | 2.3             |
| Human capital          | 300                   | 305               | -1048<br>(12868;448)                | -0.1<br>(-0.4;0.2)                     | 7754 | 7.8                          | 74.5            | 15.4            | 2.3             |
| Exclusion sports costs | 300                   | 305               | -758<br>(-2258;442)                 | -0.1<br>(-0.4;0.2)                     | 5608 | 10.1                         | 72.6            | 14.4            | 2.9             |
| Booster calls          | 300                   | 305               | -846                                | -0.1                                   | 6260 | 8.5                          | 74.1            | 15.0            | 2.3             |

| Analysis <sup>a</sup> | Sample size per group |                   | $\Delta C$<br>(95% CI) | $\Delta E$<br>(95% CI) | ICER | Distribution in CE plane (%) |          |                 |                 |
|-----------------------|-----------------------|-------------------|------------------------|------------------------|------|------------------------------|----------|-----------------|-----------------|
|                       | Control               | Inter-<br>vention |                        |                        |      | Euros                        | CVD risk | NE <sup>b</sup> | SE <sup>c</sup> |
| imputed               |                       |                   | (-2377;388)            | (-0.4;0.2)             |      |                              |          |                 |                 |
| 50 MI sets            | 300                   | 305               | -873<br>(-2380; 397)   | -0.1<br>(-0.4;0.2)     | 9915 | 7.2                          | 66.0     | 23.6            | 3.2             |
| Complete cases        | 116                   | 104               | -19<br>(-2253;1410)    | -0.03<br>(-0.34;0.29)  | 642  | 29.5                         | 27.8     | 21.3            | 21.5            |
| Health care           | 300                   | 305               | -5<br>(-316;272)       | -0.1<br>(-0.4;0.2)     | 38   | 40.1                         | 42.4     | 8.0             | 9.5             |

### QALYs gained

| Analysis <sup>a</sup>                  | Sample size per group |                   | $\Delta C$<br>(95% CI) | $\Delta E$<br>(95% CI) | ICER    | Distribution in CE plane (%) |      |                 |                 |
|----------------------------------------|-----------------------|-------------------|------------------------|------------------------|---------|------------------------------|------|-----------------|-----------------|
|                                        | Control               | Inter-<br>vention |                        |                        |         | Euros                        | QALY | NE <sup>b</sup> | SE <sup>c</sup> |
| Base case                              | 300                   | 305               | -866<br>(-2372;370)    | 0.02<br>(-0.02;0.05)   | -50,273 | 8.2                          | 76.8 | 12.9            | 2.1             |
| Discounted                             | 300                   | 305               | -851<br>(-2350;356)    | 0.02<br>(-0.02;0.05)   | -49,397 | 8.3                          | 77.2 | 12.4            | 2.2             |
| Human capital                          | 300                   | 305               | -1048<br>(12868;448)   | 0.02<br>(-0.02;0.05)   | -60,856 | 8.2                          | 77.0 | 12.5            | 2.3             |
| Exclusion sports costs                 | 300                   | 305               | -758<br>(-2258;442)    | 0.02<br>(-0.02;0.05)   | -44,015 | 10.3                         | 74.9 | 12.1            | 2.7             |
| Booster calls imputed                  | 300                   | 305               | -846<br>(-2377;388)    | 0.02<br>(-0.02;0.05)   | -49,132 | 9.1                          | 76.0 | 12.6            | 2.3             |
| 50 MI sets                             | 300                   | 305               | -873<br>(-2380; 397)   | 0.02<br>(-0.01;0.05)   | -54,335 | 7.5                          | 78.5 | 11.1            | 3.0             |
| Complete cases                         | 114                   | 98                | 110<br>(-2004;1611)    | 0.02<br>(-0.02;0.06)   | 4770    | 46.4                         | 40.6 | 4.2             | 8.7             |
| Health care perspective                | 300                   | 305               | -5<br>(-316;272)       | 0.02<br>(-0.02;0.05)   | -298    | 40.7                         | 44.7 | 5.0             | 9.6             |
| Post hoc: sick leave truncated 30 days | 300                   | 305               | -179 (-<br>725;311)    | 0.02<br>(-0.02;0.05)   | 24,865  | 5.6                          | 31.4 | 43.1            | 19.8            |

**Explanation of abbreviations and footnotes**

$\Delta C$ = mean difference in total costs between the intervention group and control group in Euros adjusted to the year 2009;  $\Delta E$ = mean difference in outcome; ICER is calculated as  $\Delta C / \Delta E$ . ICER, Incremental Cost-Effectiveness Ratio; NE, north-east; SE, south-east; SW, south-west; NW, north-west; T2DM, Type 2 Diabetes Mellitus; CVD, Cardiovascular Disease; QALY, Quality Adjusted Life Years.

<sup>a</sup> The main analysis and complete case analysis are based on the societal perspective. In the main analysis and the analysis from the health care perspective missing data were multiply imputed. The complete cases analysis was restricted to participants with complete data on costs and the particular clinical outcome. <sup>b</sup> NE quadrant: the intervention is more effective and more costly than usual care. <sup>c</sup> SE quadrant: the intervention is more effective and less costly than usual care. <sup>d</sup> SW quadrant: the intervention is less effective and less costly than usual care. <sup>e</sup> NW quadrant: the intervention is less effective and more costly than usual care.
